# Supplementary material
Source: publisher figshare collection journal article supplement (https://karger.figshare.com/articles/dataset/_/21129544)
Supplement: Supplementary file 2 [file 1]

# Patient recruitment

**Recruited**  
N = 39 term born infants, with 117 Observations  
(Conditions: 1. Non-noxious thermal stimulus,  
2. Short noxious stimulus,  
3. Prolonged unpleasant stimulus)

**Excluded**  
50 observations in 16 patients

*Technical problems during recording*  
6 observations in 2 patients excluded

*Protocol violation*  
1 observation in 1 patient excluded

*No vocalisation during stimulus*  
43 observations in 13 patient excluded

**Audio feature analysis**  
67 observations in 33 patients
